# Supplementary material for: Efficacy and Safety of a Booster Vaccination with Two Inactivated SARS-CoV-2 Vaccines on Symptomatic COVID-19 Infection in Adults: Results of a Double-Blind, Randomized, Placebo-Controlled, Phase 3 Trial in Abu Dhabi
Source: Vaccines (Basel). 2023 Jan 30;11(2):299. doi: 10.3390/vaccines11020299 (PMC9962595; doi:10.3390/vaccines11020299)
Supplement: Supplementary file 1 [file vaccines-11-00299-s001.zip › vaccines-2108764-supplementary.pdf]

# Supplement

## eMethods

### 1. Detailed inclusion and exclusion criteria

**Participants were considered eligible for the study if they met the following criteria:**

- Age range: healthy people aged 18+ years old;
- General good health as established by medical history and physical examination;
- Women of childbearing age are not pregnant (negative urine pregnancy test), are not breastfeeding, do not have pregnancy plan within the three months after enrollment, and have already taken effective contraceptive measures two weeks before enrollment;
- Participants are able and willing to complete the whole research procedure;
- Participants have the ability to understand the research procedures, to sign the informed consent voluntarily after explanation, and can comply with the requirements of the clinical research program.

**Those who met the inclusion criteria were further evaluated for the following exclusion criteria before the first dose:**

- Confirmed acute cases of SARS-CoV-2 infection;
- With a medical history of SARS, MERS virus infection (self-report, on-site inquiry);
- Fever (axillary temperature  $> 37.0^{\circ}\text{C}$ ), dry cough, fatigue, nasal obstruction, runny nose, pharyngeal pain, myalgia, diarrhea, shortness of breath and dyspnea within 14 days before vaccination (Tympanic temperature / Temporal artery temperature  $> 37.5^{\circ}\text{C}$ );
- Positive urine pregnancy test result;
- Body temperature axillary  $\geq 37.0^{\circ}\text{C}$  before vaccination (Tympanic temperature / Temporal artery temperature  $\geq 37.5^{\circ}\text{C}$ );
- With previous severe allergic reactions (such as acute allergic reactions, urticaria, skin eczema, dyspnea, angioneurotic edema or abdominal pain) or allergy to known ingredients of the inactivated SARS-CoV-2 vaccine;
- With a medical history or family history of convulsion, epilepsy, encephalopathy or mental illness; With congenital malformation or developmental disorder, genetic defects, severe malnutrition, etc.;
- With known or suspected diseases include acute respiratory diseases (e.g. influenza like illness, acute cough, sore throat), severe cardiovascular diseases, severe liver diseases, severe kidney diseases, uncontrollable hypertension (systolic blood pressure  $> 150\text{ mmHg}$ , diastolic blood pressure  $> 90\text{ mmHg}$ ), diabetic complications, malignant tumors, various acute diseases, or acute attack period of chronic diseases.
- Has been diagnosed with congenital or acquired immune deficiency, HIV infection, lymphoma, leukemia or other autoimmune diseases;
- With a history of coagulation dysfunction (such as coagulation factor deficiency, coagulation disease).
- Receiving anti-TB therapy;
- Receiving immune enhancement or inhibitor therapy within 3 months (continuous oral or IV administration for more than 14 days);
- Vaccinated live attenuated vaccine within 1 month before vaccination and other vaccines within 14 days before vaccination;

- Received blood products within 3 months before vaccination;
- Received other investigational drugs within 6 months before vaccination;
- Other circumstances judged by investigators that were not suitable for participating in this clinical trial.

## **2. The definition and description of the analysis set**

### **(1) Full Analysis Set (FAS)**

Includes all subjects who follow intent to treat (ITT) principle, undertake randomization, received the booster dose of vaccine, PCR test is negative during screening and have  $\geq 1$  follow up for case surveillance. Subjects needed to be excluded from FAS if other COVID-19 vaccines have been recorded prior to the booster immunization. Subjects who were wrongly vaccinated were randomized to evaluate their protective efficacy according to ITT principles

### **(2) Modified Full Analysis Set (mFAS)**

Includes all subjects who received the booster dose of vaccination except:

- Subjects did not enter the case surveillance period whose vaccine shed within 14 days after booster dose;
- less than 14 days after the booster dose to the cut-off date of data analysis;
- PCR-positive subjects within 14 days of booster dose;
- Subjects diagnosed with COVID-19 within 14 days of booster dose;
- Received other COVID-19 vaccines within 14 days of booster dose;
- PCR positive at the screening period.

### **(3) Vaccine efficacy Per protocol Set Analysis Set (PPS, Per Protocol Set)**

The subjects in PPS are more compliant to the protocol, including all subjects who met the inclusion/exclusion criteria, participate in randomization, received booster dose of vaccination according to the protocol requirements. Among them, subjects who met the following conditions should be excluded from PPS:

- Subjects did not enter the case surveillance period whose vaccine shed within 14 days after booster dose;
- less than 14 days after the booster dose to the cut-off date of data analysis;
- PCR-positive subjects within 14 days of booster dose;
- Subjects diagnosed with COVID-19 within 14 days of booster dose;
- Received other COVID-19 vaccines within 14 days of booster dose;
- The subjects received the wrong vaccination or incorrect dose of vaccine;
- PCR positive at the screening period;
- Use of vaccines or drugs prohibited by the protocol within 14 days of booster dose;
- Other situations that affect the evaluation of the vaccine efficacy

### **(4) Immunogenicity Full Analysis Set (iFAS)**

Includes all subjects who follow intent to treat (ITT) principle, undertake randomization, received the booster dose of vaccine, and collected blood with effective antibody titer value before completion of immunization. Subjects needed to be excluded from FAS if other COVID-19 vaccines have been recorded prior to the booster immunization. Subjects who were wrongly vaccinated were randomized to evaluate their immunogenicity analysis according to ITT principles.

### **(5) Immunogenicity Per Protocol Set 14 days after booster shot (Immunogenicity Per Protocol Set 1, iPPS1)**

Includes all subjects who met the inclusion/exclusion criteria, participate in randomization, received

booster dose of vaccination according to the protocol requirements, collected blood with effective antibody titer value before completion of immunization and 14 days after the booster dose. Subjects who met the following conditions needed to go through a blinded data review meeting to decide whether to enter iPPS1:

- The subjects violated the test protocol before blood collection
- Received other COVID-19 vaccines within 14 days of booster dose;
- The subjects received the wrong vaccination or incorrect dose of vaccine;
- Use of vaccines or drugs prohibited by the protocol within 14 days of booster dose;
- Other situations that affect the evaluation of the immunogenicity analysis.

**(6) Immunogenicity Per Protocol Set 28 days after booster shot (Immunogenicity Per Protocol Set 2, iPPS2)**

Includes all subjects who met the inclusion/exclusion criteria, participate in randomization, received booster dose of vaccination according to the protocol requirements, collected blood with effective antibody titer value before completion of immunization and 28 days after the booster dose. Subjects who met the following conditions needed to go through a blinded data review meeting to decide whether to enter iPPS2:

- The subjects violated the test protocol before blood collection
- Received other COVID-19 vaccines within 28 days of booster dose;
- The subjects received the wrong vaccination or incorrect dose of vaccine;
- Use of vaccines or drugs prohibited by the protocol within 28 days of booster dose;
- Other situations that affect the evaluation of the immunogenicity analysis.

**(7) Safety Set (SS)**

Includes all subjects who received the booster dose of vaccine. Among which, subjects with wrong vaccination were conducted safety analysis according to the actual treatment group as per All Subjects as Treated (ASaT) principle.

### **3. Case Definition**

**(1) Suspected cases:**

**Comprehensive judgment based on epidemiological history and clinical symptoms:**

- Have any of the epidemiological history, and have two or more A symptoms, or have one or more B symptoms; or with imaging features of COVID-19.
- If there is no clear epidemiological history, they should have two or more A symptoms or one or more B symptoms and detectable SARS-CoV-2 specific IgM; or have two or more A symptoms and One or more B symptoms; or with imaging features of COVID-19.

**Epidemiological history:**

- Long-term residence or stay in the epidemic area for more than 7 days; or History of travel or residence in the community where the case was reported within 14 days before the onset of illness; or
- In contact with SARS-CoV-2 infected or asymptomatic infected persons within 14 days before the onset of illness; or
- Cluster cases (2 or more cases of fever and/or respiratory symptoms occurred in a small area such as home, office, school, etc. within 2 weeks).

**Clinical symptoms:**

- Symptoms A (present for at least 2 days): fever (axillary temperature  $\geq 37.5^{\circ}\text{C}$ ); chills; sore throat; fatigue; nasal congestion or runny nose; body pain, muscle pain; headache; nausea or vomiting; diarrhea.

— Symptoms B: Cough (present for at least 2 days); new taste or smell disorders (present for at least 2 days); shortness of breath or difficulty breathing;

**Imaging features of COVID-19:**

— According to local clinical diagnosis and treatment protocol

**(2) Confirmed cases:**

— On the basis of the determination of the suspected case, the SARS-COV-2 PCR detection test result is positive.

— Encourage any possible etiological differential diagnosis.

**(3) Clinical classification:**

**Confirmed mild COVID-19 cases:**

— The clinical symptoms were mild, and there was no sign of pneumonia on imaging.

**Confirmed moderate COVID-19 cases:**

— Showing fever and respiratory symptoms with radiological findings of pneumonia.

**Confirmed severe COVID-19 cases:**

Confirmed COVID-19 case meeting any one of the following criteria:

— Respiratory distress ( $RR \geq 30$  breaths/min);

— Oxygen saturation  $\leq 93\%$  at rest;

— Arterial partial pressure of oxygen ( $PaO_2$ )/ fraction of inspired oxygen ( $FiO_2$ )  $\leq 300$  mmHg ( $1 \text{ mmHg} = 0.133 \text{ kPa}$ );

— The clinical symptoms progressively worsened, and the chest imaging showed  $>50\%$  obvious lesion progression within 24-48 hours.

**Confirmed Critical COVID-19 cases:**

Confirmed COVID-19 case meeting any one of the following criteria:

— Respiratory failure and requiring mechanical ventilation;

— Shock;

— Other organ failure that requires ICU care;

— Death

**4. Method for infectious SARS-Cov-2 neutralizing assay**

The neutralization antibody assays were performed at the National Institute of Viral Disease Control and Prevention, Beijing, China. Serum was successively diluted 1:4 to the required concentration by a 2-fold series, and an equal volume of challenge virus solution was added. After neutralization in a  $37^\circ\text{C}$  incubator for 2 h, a  $1.0 \sim 2.5 \times 10^5/\text{ml}$  cell suspension was added to the wells (0.1 ml/well) and cultured in a  $\text{CO}_2$  incubator at  $37^\circ\text{C}$  for 4 days. Titers expressed as the reciprocal of the highest dilution protecting 50% cell from virus challenge. Convalescent sera is included as an internal positive control in every assay. Seroconversion was defined as an increase in post-vaccination titer of four-fold or more from baseline.

**eTables****eTable S1. Efficacy After 14 Days Following booster Dose: Subgroup Analysis**

| Sensitivity analysis                             | WIV04 vaccine group | HB02 vaccine group | Alum-only group |
|--------------------------------------------------|---------------------|--------------------|-----------------|
| <b>Modified Full Analysis Set</b>                |                     |                    |                 |
| No. of participants                              | 3006                | 3055               | 3010            |
| No. of incident cases                            | 36                  | 28                 | 193             |
| Incidence density per 1000 person-years (95% CI) | 1.2 (0.8, 1.7)      | 0.9 (0.6, 1.3)     | 6.4 (5.6, 7.4)  |
| Vaccine efficacy (95% CI), %                     | 81.3 (73.4, 86.9)   | 85.7 (78.8, 90.4)  | Reference       |
| <b>Per protocol Set Analysis Set</b>             |                     |                    |                 |
| No. of participants                              | 3005                | 3054               | 3008            |
| No. of incident cases                            | 36                  | 28                 | 193             |
| Incidence density per 1000 person-years (95% CI) | 1.2 (0.8, 1.7)      | 0.9 (0.6, 1.3)     | 6.4 (5.6, 7.4)  |
| Vaccine efficacy (95% CI), %                     | 81.3 (73.5, 86.9)   | 85.7 (78.8, 90.4)  | Reference       |

Abbreviation: alum, aluminum hydroxide; WIV04 and HB02 groups represent the vaccine groups which were developed based on two SARS-CoV-2 strains, WIV04 and HB02 strains. Per protocol Set Analysis Set was a subset of Modified Full Analysis Set in the main analysis, Incidence density with its 95% CI was estimated using the least-square method.

**eTable S2. Efficacy After 14 Days Following booster Dose: Subgroup Analysis**

| Subgroup                                          | WIV04               | HB02                | Alum only         |
|---------------------------------------------------|---------------------|---------------------|-------------------|
| <b>Female</b>                                     |                     |                     |                   |
| No. of participants                               | 466                 | 455                 | 425               |
| No. of incident cases                             | 7                   | 3                   | 29                |
| Person-years                                      | 53.0                | 53.1                | 47.3              |
| Incidence density, per 1000 person-years (95% CI) | 13.2(6.3, 27.7)     | 5.7(1.8, 17.5)      | 61.3(42.6, 88.2)  |
| Vaccine efficacy, % (95% CI)                      | 82.7(74.2, 88.8)    | 85.5(77.8, 90.9)    | Reference         |
| <b>Male</b>                                       |                     |                     |                   |
| No. of participants                               | 2540                | 2600                | 2585              |
| No. of incident cases                             | 29                  | 25                  | 164               |
| Person-years                                      | 309.3               | 317.3               | 302.5             |
| Incidence density, per 1000 person-years (95% CI) | 9.4(6.5, 13.5)      | 7.9(5.3, 11.7)      | 54.2(46.5, 63.2)  |
| Vaccine efficacy, % (95% CI)                      | 78.4(49.7, 92.0)    | 90.8(70.3, 98.2)    | Reference         |
| Subgroup                                          | WIV04               | HB02                | Alum only         |
| <b>&lt;60 years</b>                               |                     |                     |                   |
| No. of participants                               | 2891                | 2956                | 2886              |
| No. of incident cases                             | 35                  | 27                  | 190               |
| Person-years                                      | 352.0               | 360.5               | 337.9             |
| Incidence density, per 1000 person-years (95% CI) | 9.9 (7.1, 13.9)     | 7.5 (5.1, 10.9)     | 56.2 (48.8, 64.8) |
| Vaccine efficacy, % (95% CI)                      | 82.3(74.5, 88.0)    | 86.7 (80.0, 91.5)   | Reference         |
| Subgroup                                          | WIV04               | HB02                | Alum only         |
| <b>≥60 years</b>                                  |                     |                     |                   |
| No. of participants                               | 115                 | 99                  | 124               |
| No. of incident cases                             | 1                   | 1                   | 3                 |
| Person-years                                      | 10.3                | 9.9                 | 11.9              |
| Incidence density, per 1000 person-years (95% CI) | 9.7 (1.4, 69.1)     | 10.1 (1.4, 71.9)    | 25.3 (8.2, 78.4)  |
| Vaccine efficacy, % (95% CI)                      | 61.5 (-379.5, 99.3) | 59.9 (-399.1, 99.2) | Reference         |

Abbreviation: alum, aluminum hydroxide; WIV04 and HB02 groups represent the vaccine groups which were developed based on two SARS-CoV-2 strains, WIV04 and HB02 strains.

A Poisson regression model with log link function was employed with the number of incident cases as the dependent variable, treatment group as the independent variable and the person-years as offset. Incidence density with its 95% CI was estimated using the least-square method. If the number of cases in any of the groups was <5, the exact method was used to estimate the incidence rate, vaccine efficacy and 95% CI by using StatXact software.

**eTable S3. Neutralizing Antibodies to Live SARS-CoV-2 for Male/Female Group**

|                                           | WIV04 vaccine group | HB02 vaccine group | Alum-only group |                |
|-------------------------------------------|---------------------|--------------------|-----------------|----------------|
| <b>14 d after the booster dose-male</b>   | <b>(n=252)</b>      | <b>(n=259)</b>     | <b>(n=246)</b>  | <b>P-value</b> |
| N(Missing)                                | 252 (0)             | 259 (0)            | 246 (0)         |                |
| Geometric mean titers <sup>a</sup>        | 203.1               | 493.1              | 4.7             | <0.0001        |
| 95%CI <sup>b</sup>                        | 174.0, 237.1        | 441.8, 550.4       | 4.0, 5.5        |                |
|                                           | WIV04 vaccine group | HB02 vaccine group | Alum-only group |                |
| <b>14 d after the booster dose-female</b> | <b>(n=58)</b>       | <b>(n=41)</b>      | <b>(n=44)</b>   | <b>P-value</b> |
| N(Missing)                                | 58 (0)              | 41 (0)             | 44 (0)          |                |
| Geometric mean titers                     | 152.0               | 484.8              | 3.2             | <0.0001        |
| 95%CI                                     | 105.8, 218.4        | 365.7, 642.8       | 2.3, 4.4        |                |
|                                           | WIV04 vaccine group | HB02 vaccine group | Alum-only group |                |
| <b>28 d after the booster dose-male</b>   | <b>(n=252)</b>      | <b>(n=259)</b>     | <b>(n=246)</b>  | <b>P-value</b> |
| N(Missing)                                | 252 (0)             | 259 (0)            | 246 (0)         |                |
| Geometric mean titers                     | 299.5               | 822.4              | 5.4             | <0.0001        |
| 95%CI                                     | 255.9, 350.6        | 727.0, 930.4       | 4.7, 6.4        |                |
|                                           | WIV04 vaccine group | HB02 vaccine group | Alum-only group |                |
| <b>28d after the booster dose-female</b>  | <b>(n=58)</b>       | <b>(n=41)</b>      | <b>(n=44)</b>   | <b>P-value</b> |
| N(Missing)                                | 58 (0)              | 41 (0)             | 44 (0)          |                |
| Geometric mean titers                     | 212.2               | 762.1              | 3.5             | <0.0001        |
| 95%CI                                     | 148.3, 303.6        | 563.4, 1031.0      | 2.4, 4.9        |                |

- the main analyses were performed after log transformation and results are expressed in terms of geometric mean
- The 95% confidence intervals (CI) were calculated using the exact binomial (Clopper-Pearson) methodology.

**eTable S4.Seropositive rate against 10 ancestral strains**

| Virus strain | Seropositive rate | WIV04 group (n=50) | HB02 group (n=47) | Alum only group (n=53) |
|--------------|-------------------|--------------------|-------------------|------------------------|
| 2366T        | ≥4 n (%)          | 50 (100.0)         | 47 (100.0)        | 8 (15.1)               |
|              | 95% CI            | 92.9, 100.0        | 92.5, 100.0       | 6.8, 27.6              |
| 77           | ≥4 n(%)           | 50 (100.0)         | 47 (100.0)        | 7 (13.2)               |
|              | 95% CI            | 92.9, 100.0        | 92.5, 100.0       | 5.5, 25.3              |
| 76           | ≥4 n(%)           | 50 (100.0)         | 47 (100.0)        | 4 (7.6)                |
|              | 95% CI            | 92.9, 100.0        | 92.5, 100.0       | 2.1, 18.2              |
| F13 P4       | ≥4 n(%)           | 50 (100.0)         | 47 (100.0)        | 7 (13.2)               |
|              | 95% CI            | 92.9, 100.0        | 92.5, 100.0       | 5.5, 25.3              |
| 35T P2       | ≥4 n(%)           | 50 (100.0)         | 47 (100.0)        | 6 (11.3)               |
|              | 95% CI            | 92.9, 100.0        | 92.5, 100.0       | 4.3, 23.0              |
| 56Y P3       | ≥4 n(%)           | 50 (100.0)         | 47 (100.0)        | 7 (13.2)               |
|              | 95% CI            | 92.9, 100.0        | 92.5, 100.0       | 5.5, 25.3              |
| HN97 P3      | ≥4 n(%)           | 50 (100.0)         | 47 (100.0)        | 7 (13.2)               |
|              | 95% CI            | 92.9, 100.0        | 92.5, 100.0       | 5.5, 25.3              |
| 834 Y        | ≥4 n(%)           | 50 (100.0)         | 47 (100.0)        | 6 (11.3)               |
|              | 95% CI            | 92.9, 100.0        | 92.5, 100.0       | 4.3, 23.0              |
| QD01         | ≥4 n(%)           | 50 (100.0)         | 47 (100.0)        | 8 (15.1)               |
|              | 95% CI            | 92.9, 100.0        | 92.5, 100.0       | 6.8, 27.6              |
| P701         | ≥4 n(%)           | 50 (100.0)         | 47 (100.0)        | 5 (9.4)                |
|              | 95% CI            | 92.9, 100.0        | 92.5, 100.0       | 3.1, 20.7              |

Abbreviation: alum, aluminum hydroxide; WIV04 and HB02 groups represent the vaccine groups which were developed based on two SARS-CoV-2 strains, WIV04 and HB02 strains.

WIV04: hCoV-19/Wuhan/WIV04/2019; HB02: 19nCoV-CDC-Tan-HB02

2366T: BetaCoV/Qingdao/IVDC-BJ-Xinfadi2366T/2020; 77: BetaCoV/Qingdao/IVDC-QD-envCodPackage77 /2020;

76: BetaCoV/Qingdao/IVDC-QD-Philippines76/2020; F13 P4:

BetaCoV/Wuhan/IVDC-HB-envF13/2020;

35T P2: BetaCoV/Beijing/IVDC-BJ-uk35T/2020; 56Y P3:

BetaCoV/Beijing/IVDC-BJ-austria56Y/2020;

HN97 P3: BetaCoV/Changde/IVDC-BJ-HN97/2020; 834 Y:

BetaCoV/Harbin/IVDC-BJ-russia834BY/2020;

QD01: 19nCoV-CDC-Tan-Strain04 (QD01) ; P701: W2020 (COVID-19-BJ-P7)01.

**eTable S5. Vaccine related adverse Reactions after booster Dose in the Safety Set**

| Adverse event                  | WIV04 (n=3083) | HB02 (n=3150) | Alum only (n=3076) |
|--------------------------------|----------------|---------------|--------------------|
| <b>0-7d</b>                    |                |               |                    |
| Total adverse events           | 1014 (32.9)    | 896 (28.4)    | 966 (31.4)         |
| Solicited adverse events       | 977 (31.7)     | 850 (27.0)    | 924 (30.0)         |
| Local events                   | 736 (23.9)     | 556 (17.7)    | 672 (21.9)         |
| Pain                           | 718 (23.3)     | 543 (17.2)    | 656 (21.3)         |
| Induration                     | 9 (0.3)        | 4 (0.1)       | 5 (0.2)            |
| Swelling                       | 26 (0.8)       | 19 (0.6)      | 13 (0.4)           |
| Rash                           | 4 (0.1)        | 8 (0.3)       | 6 (0.2)            |
| Redness                        | 17 (0.6)       | 13 (0.4)      | 9 (0.3)            |
| Itching                        | 17 (0.6)       | 15 (0.5)      | 8 (0.3)            |
| Systemic events                | 426 (13.8)     | 489 (15.5)    | 411 (13.4)         |
| Fever                          | 50 (1.6)       | 49 (1.6)      | 40 (1.3)           |
| Diarrhea                       | 30 (1.0)       | 31 (1.0)      | 24 (0.8)           |
| Constipation                   | 8 (0.3)        | 9 (0.3)       | 10 (0.3)           |
| Dysphagia                      | 0 (0.0)        | 1 (0.0)       | 6 (0.2)            |
| Anorexia                       | 1 (0.0)        | 2 (0.1)       | 2 (0.1)            |
| Vomiting                       | 4 (0.1)        | 3 (0.1)       | 2 (0.1)            |
| Nausea                         | 14 (0.5)       | 22 (0.7)      | 14 (0.5)           |
| Myalgia (Non-inoculated site)  | 90 (2.9)       | 104 (3.3)     | 95 (3.1)           |
| Arthralgia                     | 11 (0.4)       | 33 (1.1)      | 17 (0.6)           |
| Headache                       | 202 (6.6)      | 243 (7.7)     | 204 (6.6)          |
| Coughing                       | 44 (1.4)       | 55 (1.8)      | 42 (1.4)           |
| Dyspnea                        | 16 (0.5)       | 14 (0.4)      | 14 (0.5)           |
| Pruritus (non-inoculated site) | 12 (0.4)       | 20 (0.6)      | 6 (0.2)            |

|                                |             |            |            |
|--------------------------------|-------------|------------|------------|
| Skin and mucosal abnormalities | 2 (0.1)     | 2 (0.1)    | 0 (0.0)    |
| Acute allergic reactions       | 5 (0.2)     | 5 (0.2)    | 1 (0.0)    |
| Fatigue                        | 128 (4.2)   | 165 (5.2)  | 127 (4.1)  |
| Unsolicited adverse reactions  | 147 (4.8)   | 185 (5.9)  | 157 (5.1)  |
| <b>8-28d</b>                   |             |            |            |
| Total adverse reactions        | 17 (0.6)    | 18 (0.6)   | 26 (0.9)   |
| Solicited adverse reactions    | 0 (0.0)     | 0 (0.0)    | 0 (0.0)    |
| Local reactions                | 0 (0.0)     | 0 (0.0)    | 0 (0.0)    |
| Systemic reactions             | 0 (0.0)     | 0 (0.0)    | 0 (0.0)    |
| Unsolicited adverse reactions  | 17 (0.6)    | 18 (0.6)   | 26 (0.9)   |
| <b>Until 17 October, 2021</b>  |             |            |            |
| Total adverse reactions        | 1023 (33.2) | 909 (28.9) | 984 (32.0) |
| Solicited adverse reactions    | 977 (31.7)  | 850 (27.0) | 924 (30.0) |
| Local reactions                | 736 (23.9)  | 556 (17.7) | 672 (21.9) |
| Systemic reactions             | 426 (13.8)  | 489 (15.5) | 411 (13.4) |
| Unsolicited adverse reactions  | 163 (5.3)   | 202 (6.4)  | 181 (5.9)  |

Abbreviation: alum, aluminum hydroxide. WIV04 and HB02 groups represent the vaccine groups which were developed based on two SARS-CoV-2 strains, WIV04 and HB02 strains.

Data are shown as No. of participants with event (%). A participant was only counted once in the specific reaction category even though a participant could have more than 1 adverse reaction. For example, a participant who had the same symptom (eg, injection site pain) after each dose was counted once in the symptom category. Similarly, if a participant had more than 1 symptom in the reaction class (total, systemic, and local), they were only counted once in that adverse reaction class.

**eTable S6. The Number of Serious Adverse Events (SAEs) in the Safety Set**

| SAEs                                                                | WIV04 (n=3083) | HB02 (n=3150) | Alum only (n=3076) |
|---------------------------------------------------------------------|----------------|---------------|--------------------|
| Total SAEs                                                          | 17 (0.6)       | 11 (0.4)      | 40 (1.3)           |
| Certain infectious and parasitic SAEs                               | 7 (0.2)        | 9 (0.3)       | 38 (1.2)           |
| SAEs of the nervous system                                          | 2 (0.1)        | 1 (0.0)       | 1 (0.0)            |
| Injury, poisoning and certain other consequences of external causes | 2 (0.1)        | 0 (0.0)       | 2 (0.1)            |
| Nutritional and metabolic SAEs                                      | 1 (0.0)        | 0 (0.0)       | 2 (0.1)            |
| SAEs of kidney and urinary system                                   | 1 (0.0)        | 1 (0.0)       | 1 (0.0)            |
| SAEs of the gastrointestinal system                                 | 2 (0.1)        | 0 (0.0)       | 1 (0.0)            |
| Examinations                                                        | 2 (0.1)        | 0 (0.0)       | 0 (0.0)            |
| SAEs of the respiratory system                                      | 2 (0.1)        | 0 (0.0)       | 0 (0.0)            |
| Mental and behavioral disorders                                     | 1 (0.0)        | 1 (0.0)       | 0 (0.0)            |
| SAEs of the ear and adnexa                                          | 1 (0.0)        | 0 (0.0)       | 0 (0.0)            |
| SAEs of the musculoskeletal system and connective tissue            | 0 (0.0)        | 1 (0.0)       | 0 (0.0)            |
| Surgeries and medical procedures                                    | 1 (0.0)        | 0 (0.0)       | 0 (0.0)            |
| Systemic or injection-site SAEs                                     | 1 (0.0)        | 0 (0.0)       | 0 (0.0)            |
| SAEs of the reproductive system and breast                          | 0 (0.0)        | 0 (0.0)       | 1 (0.0)            |
| SAEs of vessels and lymphatic vessels                               | 0 (0.0)        | 0 (0.0)       | 1 (0.0)            |
| SAEs Related to Vaccination                                         | 0 (0.0)        | 0 (0.0)       | 0 (0.0)            |
| SAEs Not Related to Vaccination                                     | 17 (0.6)       | 11 (0.4)      | 40 (1.3)           |

Abbreviation: alum, aluminum hydroxide. WIV04 and HB02 groups represent the vaccine groups which were developed based on two SARS-CoV-2 strains, WIV04 and HB02 strains.

**eTable S7. Incident COVID-19 Cases and Vaccine Efficacy at different stages after Second Doses of Immunization**

| Outcome (median follow-up time, day)             | WIV04 vaccine group | HB02 vaccine group  | Alum-only group   |
|--------------------------------------------------|---------------------|---------------------|-------------------|
| <b>Interim analysis (50)</b>                     |                     |                     |                   |
| No. of participants                              | 13771               | 13765               | 13765             |
| No. of incident cases                            | 26                  | 21                  | 95                |
| Person-years                                     | 2174.5              | 2178.0              | 2161.0            |
| Incidence density per 1000 person-years (95% CI) | 1.20(0.81, 1.76)    | 0.96(0.63, 1.48)    | 4.40(3.60, 5.38)  |
| Vaccine efficacy (95% CI), %                     | 72.80(58.03, 82.37) | 78.07(64.82, 86.33) |                   |
| <b>Final analysis (154)</b>                      |                     |                     |                   |
| No. of participants                              | 14065               | 14079               | 14079             |
| No. of incident cases                            | 139                 | 118                 | 319               |
| Person-years                                     | 4027.9              | 4037.0              | 4001.0            |
| Incidence density per 1000 person-years (95% CI) | 3.45(2.92, 4.08)    | 2.92(2.44, 3.50)    | 7.97(7.14, 8.90)  |
| Vaccine efficacy (95% CI), %                     | 56.72(47.18, 64.53) | 63.34(54.72, 70.32) |                   |
| <b>Protection persistence analysis (213)</b>     |                     |                     |                   |
| No. of participants                              | 14156               | 14175               | 14169             |
| No. of incident cases                            | 291                 | 260                 | 594               |
| Person-years                                     | 6046.2              | 6068.4              | 5978.9            |
| Incidence density per 1000 person-years (95% CI) | 4.81(4.29, 5.40)    | 4.28(3.79, 4.84)    | 9.93(9.17, 10.77) |
| Vaccine efficacy (95% CI), %                     | 51.55(44.26, 57.89) | 56.87(50.11, 62.72) |                   |
